# Supplementary material for: Effects of the temperature, strain rate, and loading conditions on the deformation behaviors and mechanical properties of the Ni/Ni3Al superalloy
Source: Royal Society of Chemistry journal article supplement (doi:10.1039/d4ra04034a), 2024-01-01
Supplement: d4ra04034a1.pdf [file d4ra04034a1.pdf]

## Data availability statements

Due to the large amount of data related to the calculation results in this paper and the limitation of the data sharing conditions of our institution, it is not possible to upload all the data to the public network, so we disclose the relevant calculation script files involved in the research process.

The molecular dynamics simulation software for Large-scale Atomic/Molecular Massively Parallel Simulator (LAMMPS) can be found at <https://www.lammps.org/>.

The version of the software employed for this study is version [LAMMPS (29 Sep 2021 - Update 3)].

The molecular dynamics simulation script of the LAMMPS software as follow:

*the input script file*

```

units          metal
dimension      3
boundary       p p p
atom_style     atomic
neighbor       3.0 bin
neigh_modify   every 1 delay 0 check yes one 10000
read_data      Ni3Al72-Ni73.Imp
region         deformation block INF INF INF INF INF INF units box
group          deformation region deformation
pair_style     hybrid eam/alloy eam/fs
pair_coeff     * * eam/alloy Mishin-Ni-Al-2009.eam.alloy Ni Al
pair_coeff     * * eam/fs Ni_v2.eam.fs Ni NULL
min_style      cg
minimize       1.0-8 1.0e-8 1000 1000
timestep       0.001
thermo         1000
thermo_style   custom step temp pxx pyy pzz pxy pyz pxz lx ly lz pe ke etotal
thermo_modify  lost ignore
velocity       all create 300.0 159357 mom yes rot no
fix            0 all npt temp 300 300 0.01 aniso 0 0 0.1
run            50000
unfix         0
reset_timestep 0
change_box     all boundary s p p
region         left block INF 20 INF INF INF INF units box
region         right block 494 INF INF INF INF INF units box
group          left region left
group          right region right
group          boundary union left right
group          mobile subtract all boundary
velocity       left set 0.0 0.0 0.0 units box
fix            fixedbody boundary setforce 0.0 0.0 0.0
variable       temp equal 300.0
compute        new3d mobile temp
compute        new2d mobile temp/partial 0 1 1
thermo         1000
thermo_style   custom step temp pxx pyy pzz pxy pyz pxz lx ly lz pe ke etotal
compute        1 mobile stress/atom NULL
compute        2 mobile voronoi/atom
variable       sxxatom atom "c_1[1]/(c_2[1]*10000)"
compute        3 mobile reduce sum v_sxxatom
variable       sxx equal c_3
variable       stressxx equal "-pxx/10000"
variable       lx equal lx
variable       lx0 equal ${lx}
variable       strainx equal "(lx-v_lx0)/v_lx0"
fix            4 right move linear 0.05 0.0 0.0 units box
fix            5 mobile nvt temp 300.0 300.0 0.01
fix            2p0 all print 10000 "${strainx} ${stressxx} ${sxx}" file e-s.txt
dump           1 mobile custom 10000 dump.lammpstrj id type x y z v_sxxatom
run            2000000
print "All done"

```

The data analysis software for The Open Visualization Tool (OVITO) can be found at <https://www.ovito.org/manual/index.html#>. The version of the software employed for this study is version [OVITO 3.3.0 released].

The data analysis scripts of the OVITO software as follow:

*the dislocation density analysis script file*

```

from ovito.data import *
from ovito.io import import_file, export_file
from ovito.modifiers import DislocationAnalysisModifier

def modify(frame, data,X):

    Timestep = frame
    steps = (Timestep)
    print("step: %s" % steps)

    #赋值位错线长度到total_line_length
    total_line_length = data.attributes['DislocationAnalysis.total_line_length']

    #盒子体积
    cell_volume = data.attributes['DislocationAnalysis.cell_volume']

    #位错密度计算
    dislocation_density=total_line_length / cell_volume

    #打印位错线长度及位错密度
    print ("dislocation_length: %f" % total_line_length)
    print("Dislocation density: %f" % dislocation_density)

    #输出dump步数及对应的位错密度到当前文件夹下dislocation_density.txt文件
    f1 = open('C:/Users/Administrator/Desktop/DD.txt','a+')
    f1.write(str(steps))
    f1.write(" ")
    f1.write(str(dislocation_density))
    f1.write("\n")
    f1.close()

```

*the phase volume fraction analysis script file*

```

from ovito.data import *
from ovito.io import import_file
from ovito.modifiers import PolyhedralTemplateMatchingModifier

def modify(frame, data,X):

    Timestep = frame
    steps = (Timestep)
    print("step: %s" % steps)

    #计算结果输出: bcc/fcc/hcp/other原子数, 原子总数
    number_bcc=data.attributes['PolyhedralTemplateMatching.counts.BCC']
    number_fcc=data.attributes['PolyhedralTemplateMatching.counts.FCC']
    number_hcp=data.attributes['PolyhedralTemplateMatching.counts.HCP']
    number_other=data.attributes['PolyhedralTemplateMatching.counts.OTHER']
    total_number=data.particles.count

    #bcc/fcc/hcp/other相分数
    phase_fraction_bcc= number_bcc / total_number
    phase_fraction_fcc= number_fcc / total_number
    phase_fraction_hcp= number_hcp / total_number
    phase_fraction_other= number_other / total_number

    #打印相分数到屏幕
    print ("total_number: %f" %total_number)
    print ("phase_fraction_bcc: %f" %phase_fraction_bcc )
    print ("phase_fraction_fcc: %f" %phase_fraction_fcc )
    print ("phase_fraction_hcp: %f" %phase_fraction_hcp )
    print ("phase_fraction_other: %f" %phase_fraction_other )

    #输相分数到step-bcc-fcc-hcp-other.txt文件
    f1 = open('C:/Users/Administrator/Desktop/gt-0.0001-300K-PTM.txt','a+')
    f1.write(str(steps))
    f1.write(" ")
    f1.write(str(phase_fraction_bcc))
    f1.write(" ")
    f1.write(str(phase_fraction_fcc))
    f1.write(" ")
    f1.write(str(phase_fraction_hcp))
    f1.write(" ")
    f1.write(str(phase_fraction_other))
    f1.write("\n")
    f1.close()

```
